# Supplementary material for: Predicting the Occurrence of Variants in RAG1 and RAG2
Source: Springer Nature journal article supplement (doi:10.1007/s10875-019-00670-z), 2019-08-06
Supplement: MOESM2 [file 17043288]

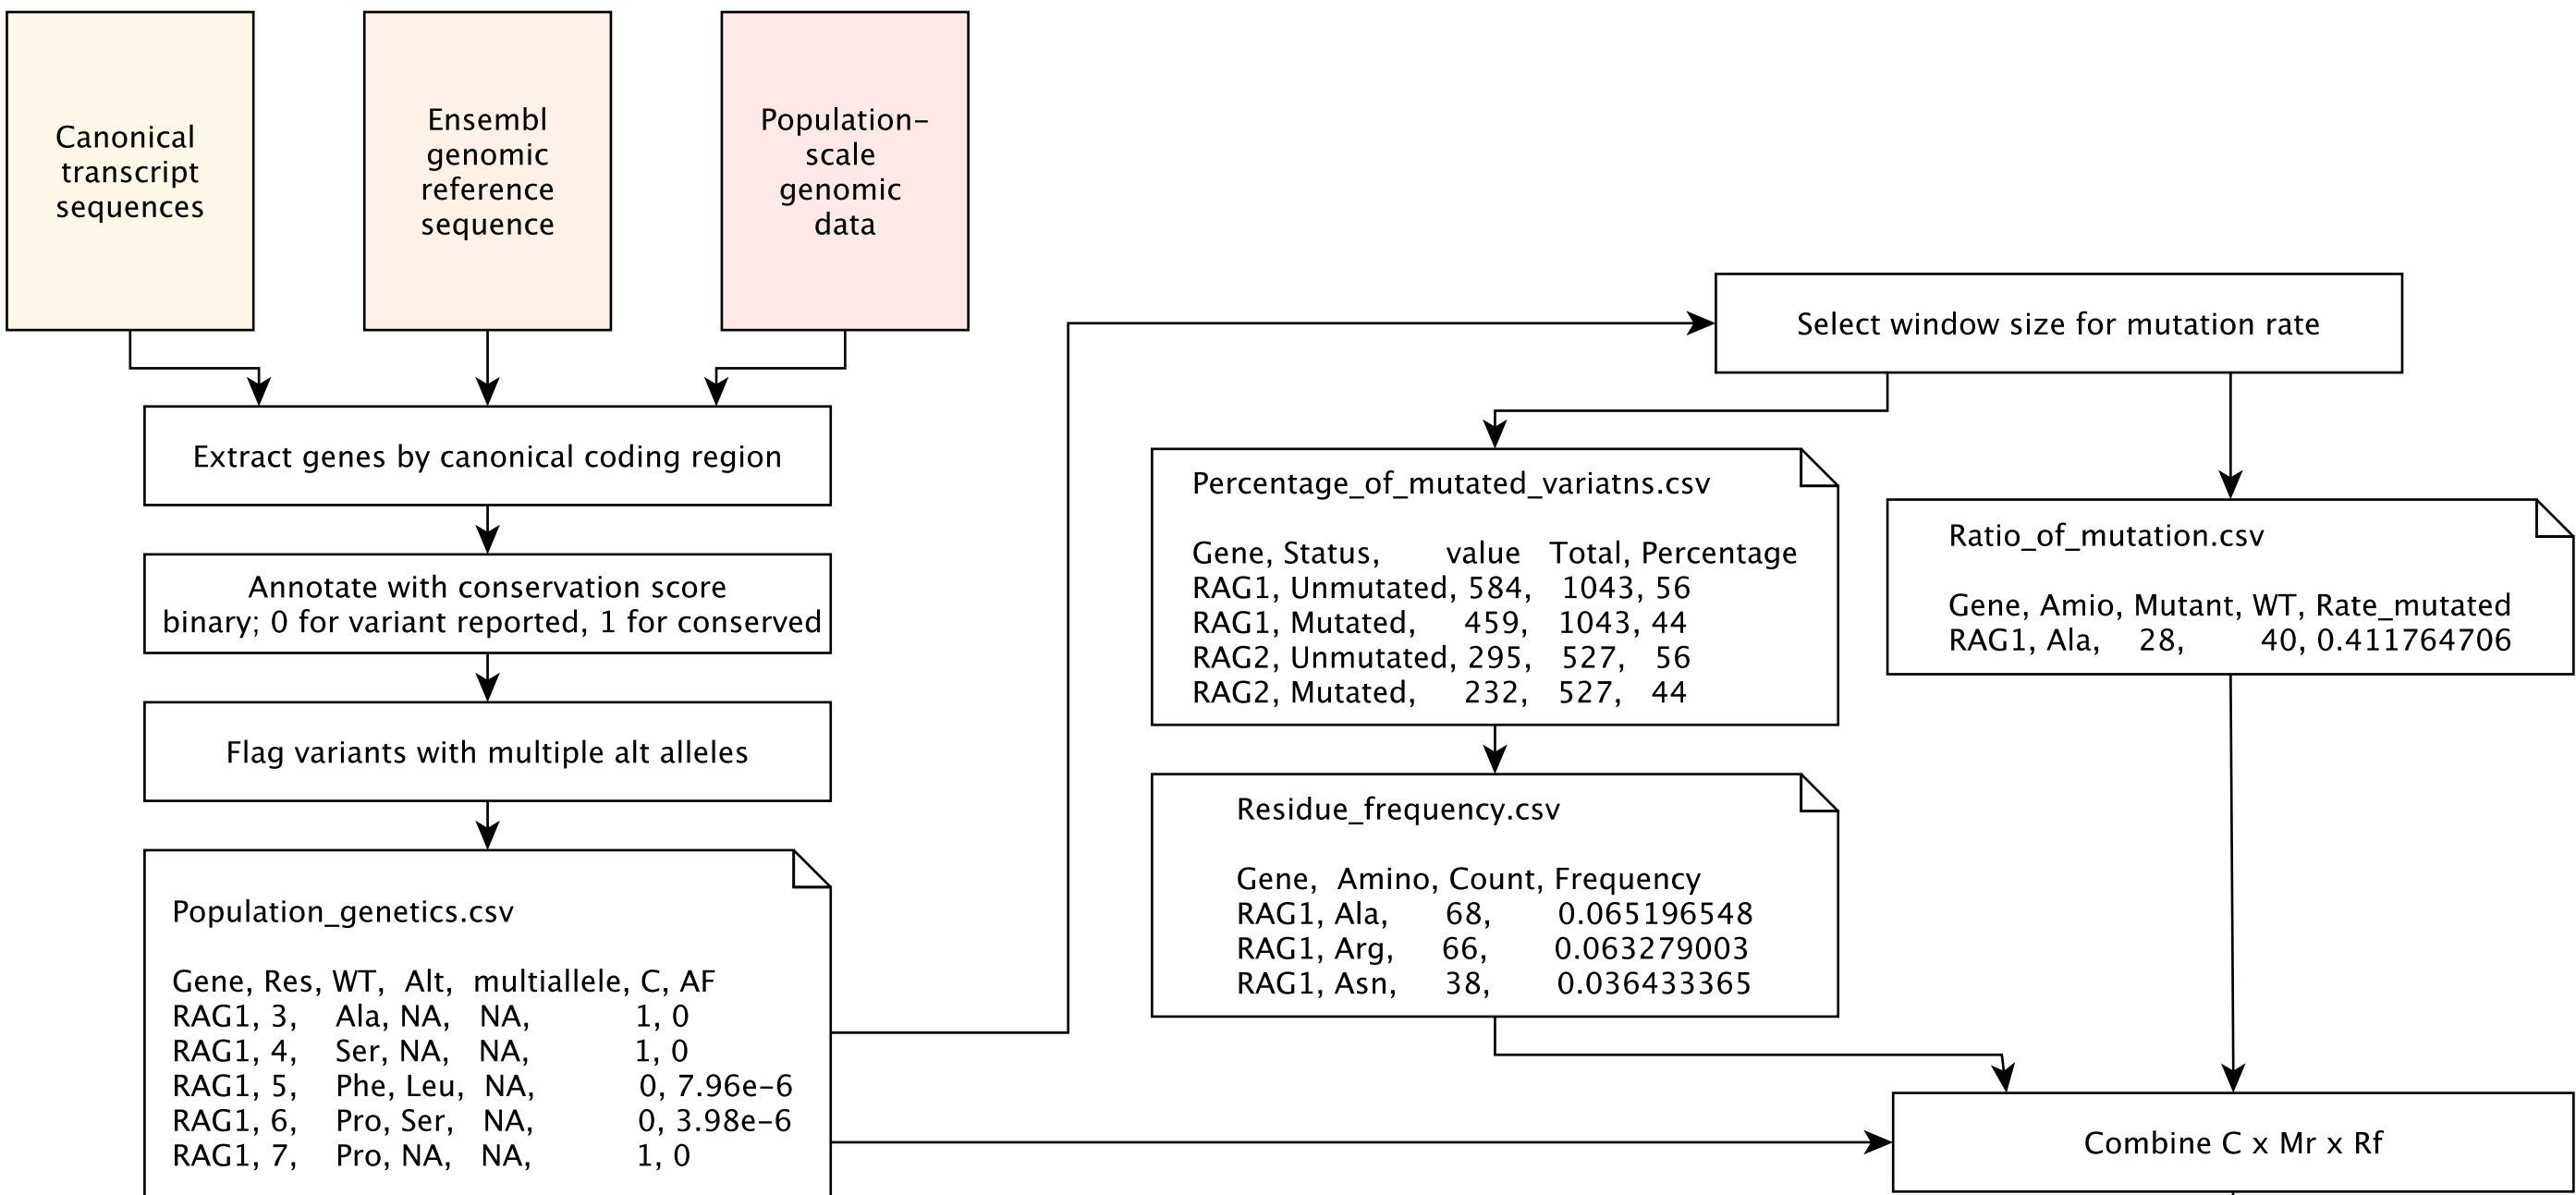

Population\_genetics.csv

| Gene | Res | WT  | Alt | multiallele | C | AF      |
|------|-----|-----|-----|-------------|---|---------|
| RAG1 | 3   | Ala | NA  | NA          | 1 | 0       |
| RAG1 | 4   | Ser | NA  | NA          | 1 | 0       |
| RAG1 | 5   | Phe | Leu | NA          | 0 | 7.96e-6 |
| RAG1 | 6   | Pro | Ser | NA          | 0 | 3.98e-6 |
| RAG1 | 7   | Pro | NA  | NA          | 1 | 0       |

Percentage\_of\_mutated\_variatns.csv

| Gene | Status    | value | Total | Percentage |
|------|-----------|-------|-------|------------|
| RAG1 | Unmutated | 584   | 1043  | 56         |
| RAG1 | Mutated   | 459   | 1043  | 44         |
| RAG2 | Unmutated | 295   | 527   | 56         |
| RAG2 | Mutated   | 232   | 527   | 44         |

Ratio\_of\_mutation.csv

| Gene | Amino | Mutant | WT | Rate_mutated |
|------|-------|--------|----|--------------|
| RAG1 | Ala   | 28     | 40 | 0.411764706  |

MRF.csv

| Gene | Res | WT  | Alt | multiallele | C | MRF   |
|------|-----|-----|-----|-------------|---|-------|
| RAG1 | 2   | Ala | NA  | NA          | 1 | 0     |
| RAG1 | 3   | Ala | NA  | NA          | 1 | 0     |
| RAG1 | 4   | Ser | NA  | NA          | 1 | 0.041 |
| RAG1 | 5   | Phe | Leu | NA          | 0 | 0.013 |
| RAG1 | 6   | Pro | Ser | NA          | 0 | 0.028 |
| RAG1 | 7   | Pro | NA  | NA          | 1 | 0.028 |

Disease database  
Clinical RAG  
deficiency

Disease database  
HMGD

Pathogenicity  
prediction  
tool  
(PHRED-CADD)

Functional  
assay  
data

Protein  
structure

Rare PID  
cohort  
genomes

Visualisation  
thresholds

Fig 1 & E1  
MRF & conservation

Fig 4  
False scores in core  
regions rescued  
by conservation

Fig 2  
MRF vesus  
allele freq

Table E2  
Clinical relevance  
of top candidates

Fig 7  
PHRED-scaled CADD score  
versus MRF score  
against HGMD data

Fig 6  
Mutation likelihood  
versus pathogenicity  
prediction

Fig 3 & E2  
MRF score  
categories &  
variants assayed  
to date

Table 1  
MRF, Assayed, Recombination activity (%)  
0.03, I56T, 3.5+/-0.2  
0.14, G99S, 113.2+/-3.7

Fig E3  
MRF mapped  
on structure

Fig 5  
MRF in RAG deficiency  
versus unrelated PIDs
