# Supplementary material for: Predicting the Occurrence of Variants in RAG1 and RAG2
Source: Springer Nature journal article supplement (doi:10.1007/s10875-019-00670-z), 2019-08-06

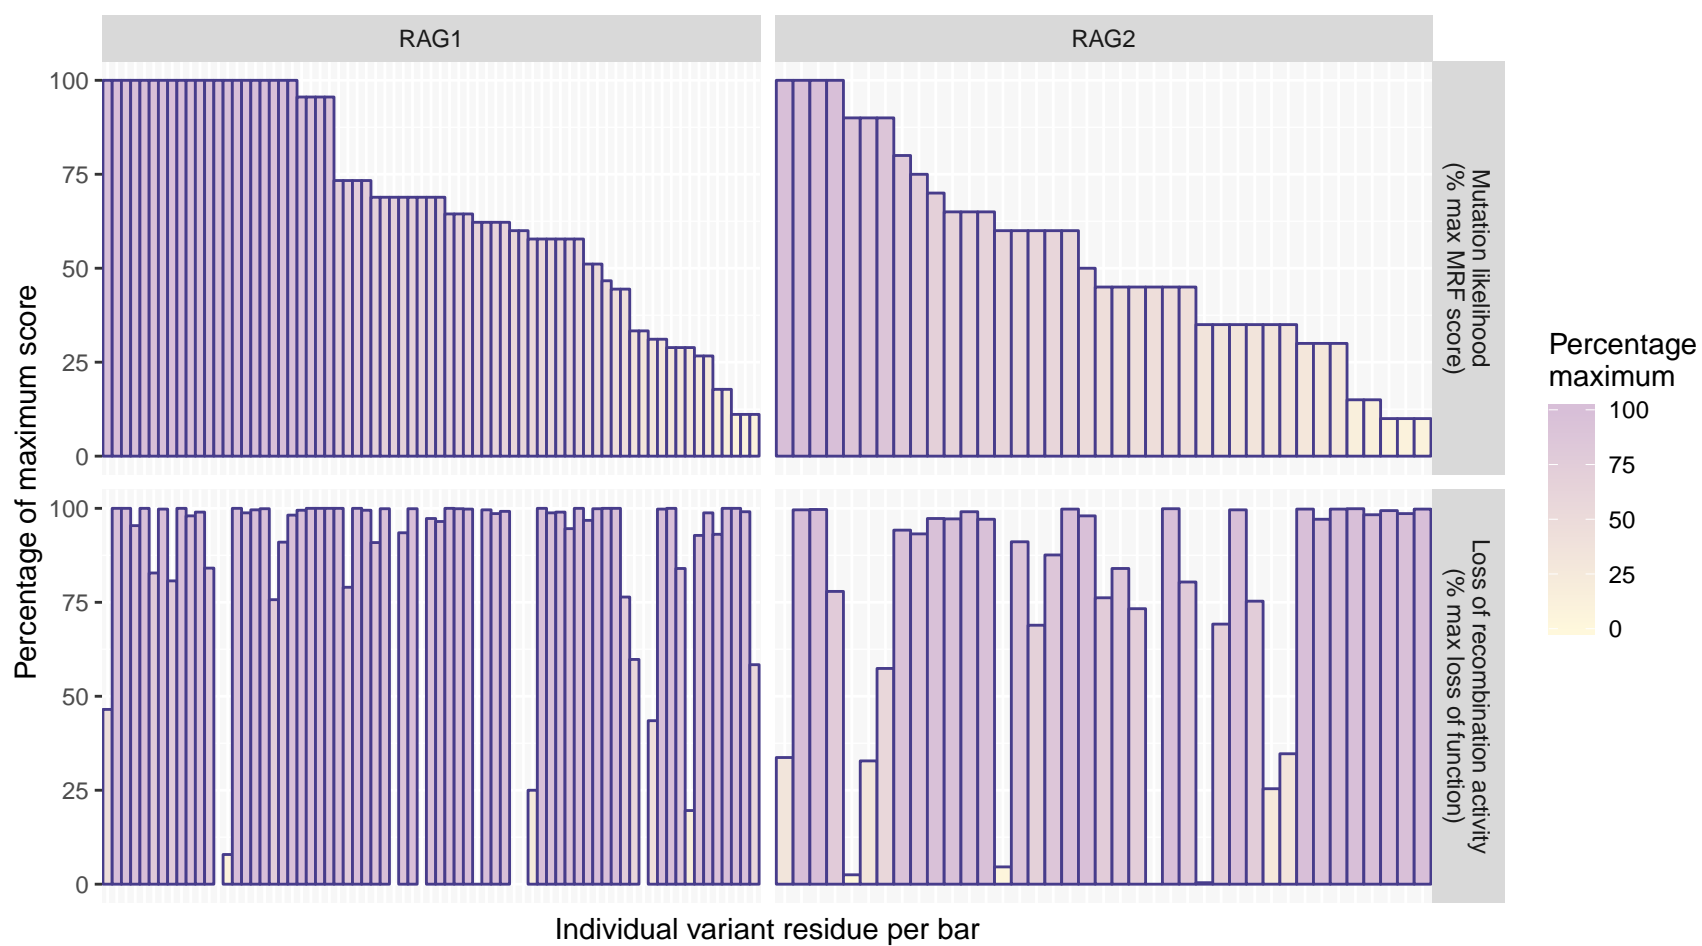

Supplement: MOESM4 [file 17043288]
